# Supplementary material for: Construction of a Psychiatric Nursing Quality Sensitivity Indicator Evaluation System Based on the Delphi Method
Source: Research Square preprint supplement (doi:10.21203/rs.3.rs-6812275/v1), 2025-07-11
Supplement: Supplementary file 1 [file 2181221c0ffea96462e642cb.docx]

Expert Consultation Questionnaire (Second Round)

Dear Expert,

Greetings!

Thank you very much for your enthusiastic support and valuable guidance in the first round of expert consultation. Based on the feedback received, we have revised, supplemented, and finalized the second-round consultation form, which includes 11 structural indicators, 20 process indicators, and 17 outcome indicators. The purpose of this round is to seek your expert opinions again on the revised indicators. We sincerely invite you to provide your guidance. To ensure the timeliness and reliability of the questionnaire, please reply within 20 working days if convenient.

All information you provide will be kept strictly confidential and used solely for this study. If you have any questions, please feel free to contact us.

Thank you again for your support!

The Fourth People’s Hospital of Chengdu
Address: No. 8 Huli West 1st Alley, Jinniu District, Chengdu, Sichuan Province, 610036
Contacts: Tao Li, Xu Du
Phone: 18008039938, 18319056989
Email: 2529143364@qq.com

**Your Name:              Contact Information:**

**Expert Consultation Form on the Psychiatric Nursing Quality-Sensitive Indicators Evaluation System in Sichuan Province – Second Round**

I. Specific Notes on Indicator Content

1. Nurse refers to individuals who have obtained a nursing license, are registered in the institution, and currently serve in nursing positions, including clinical, administrative, other nursing roles, retired rehires, and those on leave (including sick or maternity leave). Excludes: staff from non-nursing departments (e.g., administrative, logistics, insurance), unlicensed individuals, and those not registered in the institution.
2. Ward refers to all hospital departments with actual inpatient beds, including psychiatric intensive care units.
3. Actual inpatient bed-days refers to the total number of beds occupied by inpatients at 00:00 each day within a given time period.
4. Actual open beds refer to beds permanently available and in use, including authorized beds and fixed additional beds with appropriate physical conditions and standard setups open ≥ half of the statistical period. Excludes: emergency rescue, observation, operating room, recovery room, dialysis, examination, treatment, and temporary beds.
5. Years of service refers to the total nursing experience after registration, including work in other institutions and probationary periods, excluding internships or unemployment. Categories: ≤1 year, 1–2 years, 2–5 years, 5–10 years, 10–20 years, >20 years.
6. Title: Nurse, Senior Nurse, Supervisor Nurse, Associate Chief Nurse, Chief Nurse.Education: Secondary school, Associate degree, Bachelor’s, Master’s, Doctorate.
7. Resignation refers to voluntary resignation, excluding those who left due to retirement, death, dismissal, or internal transfers within the same institution.
8. Occupational injury refers to physical violence inflicted by patients or their families on nurses in the workplace.
9. Planned rehabilitation refers to physician-prescribed therapy such as group treatment or nursing rehabilitation plans, or rehabilitation-related records.
10. Nursing level is determined jointly by doctors and nurses. Bed-days at each level refer to the daily 00:00 headcount per nursing level. If a level changes during the day, the status at the time of count is recorded.
11. Falls include incidents such as falling from a bed.
12. Unauthorized departure means a psychiatric inpatient escapes a closed ward without staff supervision.
13. Pressure injuries include new stage 2 or above injuries occurring ≥24 hours after admission. If a patient is admitted with a pre-existing pressure injury and develops a stage 2+ injury after 24 hours, it counts as one case. Multiple injuries within a patient in the same time period are counted as one, graded by the highest stage.
14. Total number of inpatients equals the number at the beginning of the period plus newly admitted patients during the same period.
15. Severity of adverse nursing events is graded per the Hong Kong Hospital Authority’s classification:
16. Grade II: Minor injury (e.g., redness, abrasion), no vital sign changes, minor treatment needed.
17. Grade III: Moderate injury with partial vital changes, requires mild treatment (e.g., bandaging, suturing).
18. Grade IV: Severe injury with significant vital changes, emergency care needed (e.g., fractures, surgery, prolonged stay).
19. Grade V: Permanent disability (e.g., limb or brain injury).
20. Grade VI: Death.
21. Valid complaints refer to verified complaints. Repeated reports of the same issue count as one.

II. Instructions for Filling the Questionnaire

This form includes three sections:

Table 1: Structural Indicators

Table 2: Process Indicators

Table 3: Outcome Indicators

1. Please score each indicator based on your own experience and professional knowledge.

Operability refers to how feasible the indicator is in psychiatric nursing quality assessment.

Importance refers to the value and influence of the indicator in core systems and its significance for guiding clinical nursing.

Scoring Instructions

Very important/Very feasible = 5, Important/Feasible = 4, Neutral = 3, Unimportant/Infeasible = 2, Very unimportant/Very infeasible = 1, Please write your score in the corresponding column.

1. If any indicator is inaccurately described or should be removed, please specify edits or write “Delete” in the comments column. For modified items, please still score operability and importance.
2. If you wish to suggest new indicators, please add them in the “Additional Items” row and also provide corresponding scores. Please avoid omissions or blanks.

Table 1 Structural Index System Inquiry Table

| Indicator Dimension | Indicator Item | Indicator Definition | Calculation Formula | Operability | | | | | Importance | | | | | **Comments (Revision/Deletion)** |
| --- | --- | --- | --- | --- | --- | --- | --- | --- | --- | --- | --- | --- | --- | --- |
| **5** | **4** | **3** | **2** | **1** | **5** | **4** | **3** | **2** | **1** |
| Structural Indicator | 1.Bed cover ratio  1.1Ward Nurse-to-Bed Ratio 1.2 PICU Nurse-to-Bed Ratio | Reflects the match between open beds (incl. PICU) and nursing manpower. | 1: (Number of registered nurses ÷ actual open beds)× 100% |  |  |  |  |  |  |  |  |  |  |  |
| **2.**Nurse-to-patient ratio  2.1 Day Shift Nurse-to-Patient Ratio 2.2 Night Shift Nurse-to-Patient Ratio | Reflects the match between service demand and nursing staff. | 1: (Total patients ÷ total nurses per shift)× 100% |  |  |  |  |  |  |  |  |  |  |  |
| **3.**Average nursing hours per hospitalized patient (24h) | Reflects the actual number of nursing hours each patient receives on average over a 24-hour period. | (Actual hours worked by nurses ÷ Actual bed days for hospitalized patients) × 100% |  |  |  |  |  |  |  |  |  |  |  |
| **4.**Nurse composition ratio by years of service | Reflects the staffing structure of registered nurses working in the hospital or department during a given time period. This can indicate the competency level of the nursing staff, particularly in psychiatric specialty nursing. It helps managers understand and monitor team dynamics, skill distribution, and the accessibility of advanced nursing practice. | (Number of nurses in the department with different years of service ÷ Total number of nurses during the statistical period) × 100% |  |  |  |  |  |  |  |  |  |  |  |
| **5.**Nurse composition ratio by education level | Proportion of nurses in the department with different educational levels |  |  |  |  |  |  |  |  |  |  |  |
| **6.**Nurse composition ratio by professional title | Proportion of nurses in the department with different professional titles |  |  |  |  |  |  |  |  |  |  |  |
| **7.** Proportion of specialized nurses | （(Number of specialized nurses working in the department who hold certificates ÷ Total number of professional nurses during the same period) × 100% |  |  |  |  |  |  |  |  |  |  |  |
| **8.**Proportion of psychiatric nurses | （(Number of specialized nurses working in the department who hold certificates ÷ Total number of professional nurses during the same period) × 100% |  |  |  |  |  |  |  |  |  |  |  |
| **9.**Nurse turnover rate | Measures the internal turnover of nursing human resources within the organization. | (Number of nurses leaving ÷ ((Number of nurses at the beginning of the period + Number of nurses at the end of the period) ÷ 2)) × 100% |  |  |  |  |  |  |  |  |  |  |  |
| **10.**Nurse occupational injury rate | Focuses on nurses’ physical and mental well-being and the provision of a healthy working environment. Indicator monitoring helps identify key areas for improving nursing skills and occupational safety. | (Number of injury cases among nurses ÷ ((Number of nurses at the beginning of the period + Number of nurses at the end of the period) ÷ 2)) × 100% |  |  |  |  |  |  |  |  |  |  |  |
| **11.**Nurse job satisfaction score | Reflects the quality of the professional working environment, which directly impacts nursing behavior and patient outcomes. | Based on the national satisfaction survey calculation method |  |  |  |  |  |  |  |  |  |  |  |
| Proposed New Indicators |  |  |  |  |  |  |  |  |  |  |  |  |  |  |
